# Supplementary material
Source: ML conference proceedings conference paper supplement (https://openreview.net/forum?id=3MXph3_XP)
Supplement: supplementary_material [file attachment]

---

# Statistical Learning and Inverse Problems: A Stochastic Gradient Approach

---

Anonymous Author(s)

Affiliation

Address

email

## Abstract

1 Inverse problems are paramount in Science and Engineering. In this paper, we con-  
2 sider the setup of Statistical Inverse Problem (SIP) and demonstrate how Stochastic  
3 Gradient Descent (SGD) algorithms can be used in the linear SIP setting. We  
4 provide consistency and finite sample bounds for the excess risk. We also propose  
5 a modification for the SGD algorithm where we leverage machine learning meth-  
6 ods to smooth the stochastic gradients and improve empirical performance. We  
7 exemplify the algorithm in a setting of great interest nowadays: the Functional  
8 Linear Regression model. In this case we consider a synthetic data example and  
9 examples with a real data classification problem.

## 10 1 Introduction

Inverse Problems (IP) might be described as the search of an unknown parameter (that could be a function) that satisfies a given, known equation. Considering the notation:

$$y = A[f] + \text{noise},$$

11 where  $f$  and  $y$  are elements of given Hilbert spaces, we would like to compute (or estimate)  $f$  given  
12 the data  $y$  for some level of noise. Typically, IPs are ill-posed in the sense that the solution does  
13 not depend continuously on the data. There are several very important and impressive examples of  
14 IPs in our daily lives. Medical imaging has been using IPs for decades and it has shaped the area,  
15 as for instance, Computerized Tomography (CT) and Magnetic Resonance Imaging (MRI). For an  
16 introductory text, see Vogel [2002].

17 A vast literature of IPs is devoted to deterministic problems where the noise term is also a element of  
18 a Hilbert space and usually assumed small in norm, which is not usually verified in practice. In this  
19 work, we will take a different avenue, known as Statistical Inverse Problems (SIP). This approach is  
20 a formalization of IPs within a probabilistic setting, where the uncertainty of all measurements are  
21 properly considered. Our focus in this work is to propose a direct and practical method for solving  
22 SIP problems and, at the same time, provide theoretical guarantees for the excess risk performance of  
23 the algorithm we develop. Our algorithm is based on a gradient descent framework, where stochastic  
24 gradients (or base learner that approximates the stochastic gradients) are used to estimate general  
25 functional parameters.

26 The paper is organized as follows. We finish this section contextualizing our paper in the broad  
27 literature and stating our main contributions. In Section 2, we formally introduce the learning  
28 problem that we analyze. In Section 3, we provide examples of practical problems that fits within  
29 our formulation. In Section 4 we provide our main results and algorithms. Finally, in Section 5 we  
30 provide numerical examples and a real data application for a Functional Linear Regression problem  
31 (FLR). Due to space constraints, some of the figures, proofs and experiments were moved to the  
32 supplementary material.

## 33 1.1 Contribution

34 We provide a novel numerical method to estimate functional parameters in SIP problems using  
35 stochastic gradients. More precisely, we extend the properties and flexibility of SGD and boosting  
36 algorithms to a broader class of problems by bridging the gap between the IP and optimization  
37 communities.

38 Whereas most of the IPs methods focus on regularization strategies to “invert” the operator  $A$ , we  
39 propose a gradient descent type of algorithm to estimate the functional parameter directly. Our  
40 algorithm works in the same spirit as Stochastic Gradient Descent algorithms with sample averaging.  
41 While results of SGD are well understood in the context of regression problems in finite and infinite  
42 dimensions and SGD is well understood in deterministic IPs, SGD have not yet been considered  
43 under the SIP formulation.

44 We show that our procedure also ensures risk consistency in expectation and high probability under  
45 the statistical setting. Furthermore, we propose a modification in our algorithm to substitute the  
46 stochastic gradients by base learners similarly to boosting algorithms, Mason et al. [1999], Friedman  
47 [2001]. This modification improve a common challenge faced by SIP problems: the discretization  
48 procedures of the operator  $A$  that arises in SIP.

## 49 1.2 Literature Review

50 Historically, SIP was first introduced in Sudakov and Khalfin [1964] where IPs from Mathematical  
51 Physics were recast into a statistical framework. For a more structured introduction, we forward the  
52 reader to Kaipio and Somersalo [2004]. Several advances were made in the parametric approach to  
53 SIP, where the unknown function is assumed to be completely described by an unknown parameter  
54 living in a finite dimensional space, see for instance Evans and Stark [2002]. In our paper, however,  
55 we will consider the nonparametric framework as described in Cavalier [2008]. In this setting, we see  
56 the IP as a search of an element of an infinite dimensional space.

57 When considering IPs (and SIP, in particular), there are several ways to regularize the problem in order  
58 to deal with its ill-posedness. For instance, one could consider roughness penalty or a functional basis  
59 as in Tenorio [2001]. Additionally, one could examine Tikhonov and spectral cut-off regularizations  
60 as in Bissantz et al. [2007]. For many of those standard approaches, consistency under the SIP setting  
61 and rates of convergences were established. See for instance Bissantz et al. [2004], Bissantz and  
62 Holzmann [2008]. A thorough discussion of stochastic gradient algorithms is outside the scope of  
63 this work and we refer the reader to Zinkevich [2003], Nesterov et al. [2018] and references therein.

64 Applications of Machine Learning (or Deep Learning, in particular) to solve IPs have been numerous  
65 in recent years, but, in our opinion, akin of the capabilities that these new techniques could bring to  
66 this area of research. Some attention have been given to imaging problems as in Jin et al. [2017] and  
67 Ongie et al. [2020]. Under deterministic IP, the paper Li et al. [2020] studies the regularization and  
68 convergence rates of penalized neural networks when solving regression problems. See also Adler  
69 and Öktem [2017] and Bai et al. [2020]. Other important references regarding SGD for deterministic  
70 IP are Jin et al. [2021], Tang et al. [2019], Jin et al. [2020].

71 The main examples we bring in our paper is the class of Functional Linear Regression (FLR). This  
72 problem has drawn the attention of the statistical, econometric and computer science communities in  
73 the past decade, see Cai and Hall [2006], Yao et al. [2005], Hall and Horowitz [2007]. The usual  
74 methodology applied to this problem is the well-known FDA. For example, one could consider a  
75 prespecified basis functions to regularize the regression problem Goldsmith et al. [2011] or one could  
76 use the Functional Principal Component (FPC) basis, Morris [2015]. More recently, methods inspired  
77 in machine learning for standard linear regression problems were also extended to the FLR setting, see  
78 for instance James et al. [2009], Fan et al. [2015] for methods that are suitable for high dimensional  
79 covariates or interpretable in the LASSO sense. In this work we show how our modification to the  
80 SGD algorithm can be seen as an averaging of boosting estimators and can also be used to estimate  
81 FLR models in the high-dimensional setting.

## 82 2 Problem Formulation

83 We start by fixing a probability space  $(\Omega, \mathcal{A}, \mathbb{P})$  and a vector space  $\mathbb{X}$  of inputs. We denote the random  
 84 input by  $\mathbf{X} \in L^2(\Omega, \mathcal{A}, \mathbb{P})$  taking values in  $\mathbb{X}$  and consider the space  $L^2(\mathbb{X})$  of functions  $g : \mathbb{X} \rightarrow \mathbb{R}^d$   
 85 with inner product  $\langle g_1, g_2 \rangle_{L^2(\mathbb{X})} = \mathbb{E}[\langle g_1(\mathbf{X}), g_2(\mathbf{X}) \rangle]$  and norm  $\|g\|_{L^2(\mathbb{X})}^2 = \mathbb{E}[\|g(\mathbf{X})\|^2] < +\infty$ ,  
 86 where  $\langle \cdot, \cdot \rangle$  and  $\|\cdot\|$  are the inner product and norm of  $\mathbb{R}^d$ .

87 Similarly, we define the space  $L^2(\mathbb{W})$  of functions from  $\mathbb{W}$  taking values in  $\mathbb{R}^k$  square-integrable with  
 88 respect to the measure space  $(\mathbb{W}, \mathcal{B}, \mu)$ . Finally, we consider an operator  $A : L^2(\mathbb{W}) \rightarrow L^2(\mathbb{X})$ .  
 89 This operator defines a direct problem and we assume that it is known. Given  $f \in L^2(\mathbb{W})$ , we use  
 90 the notation  $A[f] \in L^2(\mathbb{X})$ , i.e.  $A[f]$  is a square-integrable function  $A[f] : \mathbb{X} \rightarrow \mathbb{R}^d$ .

91 We are interested in solving the statistical inverse problem related to  $A$ : jointly to observing samples of  
 92  $\mathbf{X}$  taking values in  $\mathbb{X}$ , we observe noisy samples of  $A[f^\circ](\mathbf{X})$ , for some fixed, unknown  $f^\circ \in L^2(\mathbb{W})$ ,  
 93 which we denote by  $\mathbf{Y}$ :

$$\mathbf{Y} = A[f^\circ](\mathbf{X}) + \epsilon, \quad (1)$$

94 where  $\epsilon$  is a zero-mean random noise. The problem we will pore over in this paper is the estimation  
 95 of  $f^\circ$  based on this given sample.

96 Let  $\ell : \mathbb{R}^d \times \mathbb{R}^d \rightarrow \mathbb{R}_+$  be a point-to-point loss function as, for example, the squared loss  $\ell(\mathbf{y}, \mathbf{y}') =$   
 97  $\frac{1}{2}\|\mathbf{y} - \mathbf{y}'\|^2$ . We define the populational risk as:

$$\mathcal{R}_A(f) \triangleq \mathbb{E}[\ell(\mathbf{Y}, A[f](\mathbf{X}))],$$

98 and we would like to solve:

$$\inf_{f \in \mathcal{F}} \mathcal{R}_A(f), \quad (2)$$

99 where  $\mathcal{F} \subset L^2(\mathbb{W})$  is a linear subspace with  $f^\circ \in \mathcal{F}$ . We will denote by  $\partial_2$  the partial derivative  
 100 with respect to the second argument.

101 Given a sample, we will study how to control the excess risk of a functional estimator  $\hat{f}$  of  $f^\circ$ :

$$\mathcal{R}_A(\hat{f}) - \inf_{f \in \mathcal{F}} \mathcal{R}_A(f). \quad (3)$$

102 Instead of taking the standard route of solving the Empirical Risk Minimization problem and later  
 103 establishing results for (3), in 4 we show how our Algorithms allows us to control directly to tackle  
 104 (3) directly by constructing stochastic gradients directly for the populational risk.

## 105 3 Examples: motivation

106 Before we formalize our results, we first motivate the study of Eq. (1) with a few of applications.  
 107 Each of those problems have a myriad of solutions on their own. For more information on those IPs,  
 108 see, for instance, Vogel [2002].

**Deconvolution.** This type of inverse problems relate the values of  $\mathbf{Y}$  and  $\mathbf{X}$  through the following  
 convolution equation:

$$\mathbf{Y} = \int_{\mathbb{W}} k(\mathbf{X} - \mathbf{w})f(\mathbf{w})d\mu(\mathbf{w}) + \epsilon,$$

where  $\mathbb{X} = \mathbb{W} = \mathbb{R}^d$  and the kernel  $k$  is known. In this case, we define the operator  $A$  as:

$$A[f](\mathbf{x}) = \int_{\mathbb{W}} k(\mathbf{x} - \mathbf{w})f(\mathbf{w})d\mu(\mathbf{w}).$$

**Functional Linear Regression.** Consider the scalar, multivariate response model of functional linear  
 regression: let  $\mathbb{X} = L^2([0, T])$  taking values in  $\mathbb{R}^d$ ,  $\mathbb{W} = [0, T]$ ,  $\mu$  is the Lebesgue measure in  $[0, T]$   
 and  $\mathbf{Y}$  is giving by the following model

$$\mathbf{Y} = \int_0^T f(s)\mathbf{X}(s)ds + \epsilon,$$

where  $f \in L^2(\mathbb{W})$  is taking values in  $\mathbb{R}$ . Here we changed the notation from  $\mathbf{w}$  to  $s$  in order to keep the classical notation from FLR. In this case,

$$A[f](\mathbf{x}) = \int_0^T f(s)\mathbf{x}(s)ds.$$

109 The model can be easily extended to deal with  $\mathbf{Y}$  taking label values such as in a classification  
110 problem as we will show in the numerical studies.

111 Due to space constraints, we provide examples in the FLR setting. In the supplementary material, we  
112 demonstrate how the Algorithms presented in Section 4.2 also in deconvolution problems.

## 113 4 Theoretical Results and Algorithms

114 In this paper, we consider the following set of assumptions.

### 115 **Assumption 4.1.**

116 1.  $A : L^2(\mathbb{W}) \rightarrow L^2(\mathbb{X})$  is a linear, bounded operator;

117 2.  $\ell$  is a convex and  $C^2$  function in its second argument;

3. There exists  $\theta_0 > 0$  such that, for all  $f, g \in L^2(\mathbb{W})$ ,

$$\sup_{|\theta| \leq \theta_0} \mathbb{E}[\partial_{22}\ell(Y, A[f](\mathbf{X}) + \theta A[g](\mathbf{X}))(A[g](\mathbf{X}))^2] < \infty;$$

118 4.  $f^\circ \in \arg \min_{f \in \mathcal{F}} \mathcal{R}_A(f)$  and  $\mathcal{R}_A(f^\circ) > -\infty$ ;

119 5.  $\sup_{f, f' \in \mathcal{F}} \|f - f'\|_{L^2(\mathbb{W})} = D < \infty$ .

120 Assumption 1 is our strongest one, since it imposes that our operator is linear and bounded. Nev-  
121 ertheless, linear SIPs encompass a wide class of problems of practical and theoretical interest for  
122 engineering, statistics and computer science communities among others, a few of them presented in  
123 Section 3. Moreover, the nonlinear case could be similarly studied with more cumbersome notation  
124 and assumptions. Assumption 2 is standard for gradient based algorithms and is commonly assumed  
125 in many learning problems. Assumption 3 is a mild integrability condition of the loss function com-  
126 monly satisfied in many practical situations. For instance, in the squared loss case, this assumption  
127 becomes  $\mathbb{E}[(A[g](\mathbf{X}))^2] < \infty$ , which is automatically satisfied since  $A[g] \in L^2(\mathbb{X})$ . Assumption 4 is  
128 needed so the problem we analyze indeed have a solution. Assumption 5 is stating that the diameter  
129 of the set  $\mathcal{F}$  is finite.

130 One should notice that our set of assumptions does include the class of ill-posed (linear) inverse  
131 problems since we do not need to assume that  $A$  is bijective. If that were the case, it is known that  
132 then  $A$  would have a bounded inverse, and then, the IP would not be ill-posed.

133 In the next sections we provide our theoretical results. Instead of following the common approach of  
134 minimizing the Empirical Risk Minimization problem, we show how to compute stochastic gradients  
135 in order to control directly for the excess risk (3) both in expectation and in probability.

### 136 4.1 Preliminaries

Our first result allows us to compute the gradient of the populational risk at a given functional  
parameter  $f$ . Before we present it, note that, by linearity,  $A : L^2(\mathbb{W}) \rightarrow L^2(\mathbb{X})$  is differentiable and,  
for every  $f, g \in L^2(\mathbb{W})$ , we have that the directional derivative of  $A[f]$  in the direction  $g$  is given by

$$DA[f](g) = \lim_{\delta \rightarrow 0} \frac{1}{\delta} (A[f + \delta g] - A[f]) = A[g].$$

Note that the directional derivative does not depend on the point  $f$  that we are evaluating the  
gradient. Let  $A^*$  denote the adjoint operator of  $A$  defined as the linear and bounded operator  
 $A^* : L^2(\mathbb{X}) \rightarrow L^2(\mathbb{W})$  such that<sup>1</sup>

$$\langle A[f], g \rangle_{L^2(\mathbb{X})} = \langle f, A^*[g] \rangle_{L^2(\mathbb{W})}.$$

137 The following lemma holds true:

---

<sup>1</sup>The adjoint of a linear, bounded operator always exists.

**Lemma 4.2.** Under 1, 2 and 3 of Assumption 4.1 we have that

$$\nabla \mathcal{R}_A(f) = A^*[\phi] \in L^2(\mathbb{W}),$$

where  $\phi(\mathbf{x}) = \mathbb{E}[\partial_2 \ell(\mathbf{Y}, A[f](\mathbf{x})) \mid \mathbf{X} = \mathbf{x}]$ .

*Proof.* Firstly, define, for fixed  $(\mathbf{X}, \mathbf{Y})$ ,

$$\psi(\delta) = \ell(\mathbf{Y}, A[f + \delta g](\mathbf{X})) = \ell(\mathbf{Y}, A[f](\mathbf{X}) + \delta A[g](\mathbf{X})).$$

Then, we get the directional derivative of the risk function in direction  $g$  by applying the Taylor formula for  $\psi$  as a function of  $\delta$  around  $\delta = 0$ :

$$\begin{aligned} D\mathcal{R}_A(f)(g) &= \lim_{\delta \rightarrow 0} \frac{1}{\delta} (\mathcal{R}_A(f + \delta g) - \mathcal{R}_A(f)) \\ &= \lim_{\delta \rightarrow 0} \frac{1}{\delta} \mathbb{E}[\psi(\delta) - \psi(0)] \\ &= \lim_{\delta \rightarrow 0} \mathbb{E} \left[ \frac{1}{\delta} \left( \delta \partial_2 \ell(\mathbf{Y}, A[f](\mathbf{X})) A[g](\mathbf{X}) \right. \right. \\ &\quad \left. \left. + \frac{1}{2} \delta^2 \partial_{22} \ell(\mathbf{Y}, A[f](\mathbf{X}) + \theta A[g](\mathbf{X})) (A[g](\mathbf{X}))^2 \right) \right], \end{aligned}$$

where  $\theta$  comes from the Taylor formula and it is between  $-\theta_0$  and  $\theta_0$ , for some fixed  $\theta_0 > 0$ . Hence, by Assumption 3, we find

$$D\mathcal{R}_A(f)(g) = \mathbb{E}[\partial_2 \ell(\mathbf{Y}, A[f](\mathbf{X})) A[g](\mathbf{X})].$$

By the definition of  $\phi$  and by conditioning in  $\mathbf{X}$ , we find

$$D\mathcal{R}_A(f)(g) = \mathbb{E}[\phi(\mathbf{X}) A[g](\mathbf{X})] = \langle \phi, A[g] \rangle_{L^2(\mathbb{X})} = \langle A^*[\phi], g \rangle_{L^2(\mathbb{W})}.$$

Finally, we get that the descent direction  $\nabla \mathcal{R}_A(f)$  is given by  $A^*[\phi] \in L^2(\mathbb{W})$ .  $\square$

By the linearity and boundedness of  $A^*$ , we find the following very useful representation for the gradient of  $\mathcal{R}_A$ :

**Lemma 4.3.** Consider the case  $d = 1$  for simplicity of notation. For each  $\mathbf{w} \in \mathbb{W}$  fixed, there exists a kernel  $\Phi(\cdot; \mathbf{w}) : \mathbb{X} \rightarrow \mathbb{R}$  such that

$$A^*[g](\mathbf{w}) = \mathbb{E}[\Phi(\mathbf{X}; \mathbf{w}) g(\mathbf{X})].$$

*Proof.* First, notice that  $\varphi_{\mathbf{w}}(g) = A^*[g](\mathbf{w})$  is an element of the dual of  $L^2(\mathbb{X})$ . Hence, by the Riesz Representation Theorem, there exists a kernel  $\Phi(\cdot; \mathbf{w}) : \mathbb{X} \rightarrow \mathbb{R}$  such that, for all  $g \in L^2(\mathbb{X})$ ,

$$A^*[g](\mathbf{w}) = \varphi_{\mathbf{w}}(g) = \langle \Phi(\cdot; \mathbf{w}), g \rangle_{L^2(\mathbb{X})} = \mathbb{E}[\Phi(\mathbf{X}; \mathbf{w}) g(\mathbf{X})],$$

as desired.  $\square$

**Corollary 4.4.** If  $\ell$  is the squared loss function  $\ell(\mathbf{y}, \mathbf{y}') = \frac{1}{2} \|\mathbf{y} - \mathbf{y}'\|^2$ , then the gradient of the risk function with respect to  $f$  is given by

$$\nabla \mathcal{R}_A(f) = -A^*[\bar{\mathbf{Y}} - A[f]] = \mathbb{E}[\Phi(\mathbf{X}; \mathbf{w})(A[f](\mathbf{X}) - \bar{\mathbf{Y}}(\mathbf{X}))],$$

where  $\bar{\mathbf{Y}}(\mathbf{x}) = \mathbb{E}[\mathbf{Y} \mid \mathbf{X} = \mathbf{x}]$ .

Because of the results above, it is possible to construct an unbiased estimator for the gradient for the risk function for any  $f$ . In fact, considering the case  $d = 1$ , for a given sample  $(\mathbf{x}, \mathbf{y})$  and a fixed function  $f$ , we define, for any  $\mathbf{w} \in \mathbb{W}$ ,

$$u_f(\mathbf{w}; \mathbf{x}, \mathbf{y}) = \Phi(\mathbf{x}; \mathbf{w})(A[f](\mathbf{x}) - \mathbf{y}). \quad (4)$$

Therefore, conditioning in  $\mathbf{X}$ , we find

$$\begin{aligned} \mathbb{E}[u_f(\mathbf{w}; \mathbf{X}, \mathbf{Y})] &= \mathbb{E}[\Phi(\mathbf{X}; \mathbf{w})(A[f](\mathbf{X}) - \mathbf{Y})] \\ &= \mathbb{E}[\mathbb{E}[\Phi(\mathbf{X}; \mathbf{w})(A[f](\mathbf{X}) - \mathbf{Y}) \mid \mathbf{X}]] \\ &= \mathbb{E}[\Phi(\mathbf{X}; \mathbf{w})(A[f](\mathbf{X}) - \mathbb{E}[\mathbf{Y} \mid \mathbf{X}])] \\ &= \mathbb{E}[\Phi(\mathbf{X}; \mathbf{w})(A[f](\mathbf{X}) - \bar{\mathbf{Y}}(\mathbf{X}))] \\ &= \nabla \mathcal{R}_A(f)(\mathbf{w}). \end{aligned}$$

The main benefit is that with only one observation we are able to compute an unbiased estimator for the gradient of the risk function under the true distribution.

## 160 4.2 Proposed Algorithms

161 Inspired by Lemma 4.2, we propose the following SGD algorithm for SIP problems that we called  
 162 SGD-SIP: given an initial guess  $f_0$ , for each step  $i$ , we compute, following Eq. (4), an unbiased  
 163 estimator  $u_i$  for the gradient of the loss function. Next, we update an accumulated functional  
 164 parameter by taking a stochastic gradient step in the direction of  $u_i$  with step size  $\alpha_i$ . In the last  
 165 step, we average all the accumulated gradient steps in the same spirit as Polyak and Juditsky [1992].  
 166 The choice of the step size needs to satisfy two criteria:  $\sum_{i=1}^n \alpha_i$  sublinear in  $n$ , and  $n\alpha_n \rightarrow \infty$  as  
 167  $n \rightarrow +\infty$ . We formally justify those desired properties in Theorem 4.5.

---

### Algorithm 1: SGD-SIP

---

**input** : sample  $\{\mathbf{x}_i, \mathbf{y}_i\}_{i=1}^n$ , operator  $A$ , initial guess  $f_0$   
**output** :  $\hat{f}_n$   
 $\hat{g}_0 = f_0$ ;  
 168 **for**  $1 \leq i \leq n$  **do**  
     Compute  $u_i(\mathbf{w}) = \Phi(\mathbf{x}_i; \mathbf{w})(A[\hat{g}_{i-1}](\mathbf{x}_i) - \mathbf{y}_i)$ ;  
      $\hat{g}_i = \hat{g}_{i-1} - \alpha_i u_i$ ;  
**end**  
 Set  $\hat{f}_n = \frac{1}{n} \sum_{i=1}^n \hat{g}_i$ ;

---

169 Algorithm 1 uses only one sample at a time in order to estimate the gradient of the true risk function.  
 170 In order to preserve this property, we make the number of iterations equal to the sample size; it cannot  
 171 be larger. This connects with the stopping rules in iterative algorithms in IP.

172 Algorithm 1 has a limitation common to many approaches to Inverse Problems: one cannot hope to  
 173 compute  $u_i$  for every possible  $\mathbf{w}_i$  and some discretization of the operator  $A$  is needed, see Kaipio  
 174 and Somersalo [2007]. Since the SGD-SIP algorithm only computes the stochastic gradient in the  
 175 points of discretization, it risks overfitting the data and provides non-smooth estimators. Next, we  
 176 motivate Algorithm 2 in order to overcome the discretization problem by leveraging machine learning  
 177 methods.

178 Consider that the space  $\mathbb{W}$  was discretized in a grid of size  $n_w$ . In order to fully estimate the function  
 179  $\hat{f}_n(\mathbf{w})$  for every  $\mathbf{w} \in \mathbb{W}$ , we consider a hypothesis class  $\mathcal{H}$  and, in each step, we fit a function  $\hat{h}_i^*$  on  
 180 the stochastic gradient  $u_i$  in the discretized grid of  $\mathbb{W}$ . Note that in this case,  $\mathcal{F}$  will be given by the  
 181 linear span of the class  $\mathcal{H}$ . Each of these functions  $h_i^*$  can be seen as a base-learner in the same spirit of  
 182 Boosting estimators, widely used in standard regression problem in the context of SIP Mason et al.  
 183 [1999], Friedman [2001]. Next we present our algorithm ML-SGD.

---

### Algorithm 2: ML-SGD

---

**input** : sample  $\{\mathbf{x}_i, \mathbf{y}_i\}_{i=1}^n$ , discretization  $\{\mathbf{w}_j\}_{j=1}^{n_z}$  of  $\mathbb{W}$ , operator  $A$ , initial guess  $f_0$   
**output** :  $\hat{f}_n$   
 $\hat{g}_0 = f_0$ ;  
**for**  $1 \leq i \leq n$  **do**  
     **for**  $1 \leq j \leq n_w$  **do**  
         184     Compute  $u_i(\mathbf{w}_j) = \Phi(\mathbf{x}_i; \mathbf{w}_j)(A[\hat{g}_{i-1}](\mathbf{x}_i) - \mathbf{y}_i)$ ;  
     **end**  
      $h_i^* \in \arg \min_{h \in \mathcal{H}} \sum_{j=1}^{n_z} (u_i(\mathbf{w}_j) - h(\mathbf{w}_j))^2$ ;  
      $\hat{g}_i = \hat{g}_{i-1} - \alpha_i h_i^*$ ;  
**end**  
 Set  $\hat{f}_n = \frac{1}{n} \sum_{i=1}^n \hat{g}_i$ ;

---

185 The goal of ML-SGD is twofold. First, it allows us to interpolate the function  $h_j^*$  to points  $\mathbf{w}$   
 186 not used in the discretization grid. Second, the ML procedure smooths the noise in each gradient  
 187 step calculation leading to smoother approximations that helps avoiding over-fitting. We show in  
 188 Section 5 and in the supplementary material the benefits of such an approximation when estimating  
 189 the functional parameter  $f^\circ$  in both simulated and empirical examples.

### 190 4.3 Main Result

191 Our main result is a finite sample bound for the expected excess risk of Algorithm 1. The result also  
192 extends to Algorithm 2 in the case where the base learner are also unbiased estimators.

193 **Theorem 4.5.** *Under Assumption 4.1 and if the kernel  $\Phi$  satisfies  $C = \sup_{\mathbf{x} \in \mathbb{X}} \|\Phi(\mathbf{x}, \cdot)\|^2 < +\infty^2$ ,*  
194 *we have the following performance guarantee for Algorithm 1:*

$$\mathbb{E} \left[ \mathcal{R}_A(\hat{f}_n) - \inf_{f \in \mathcal{F}} \mathcal{R}_A(f) \right] \leq \frac{D^2}{2n\alpha_n} + \frac{M(A, \mathcal{F})}{n} \sum_{i=1}^n \alpha_i,$$

195 where  $M(A, \mathcal{F}) = C(\mathbb{E}[\|\mathbf{Y}\|^2] + \|A\|^2 D^2) < \infty$ .

196 The proof of the theorem is provided in the supplementary material. Theorem 4.5 implies that if  
197 we pick the decreasing sequence  $\{\alpha_i\}_{i=1}^n$  so that  $n\alpha_n \rightarrow \infty$  ( $\alpha_n$  cannot decrease too fast) but fast  
198 enough so that  $\frac{1}{n} \sum_{i=1}^n \alpha_i \rightarrow 0$ , then we get the convergence result. For instance, one could take  
199  $\alpha_i = \eta/\sqrt{i}$  for some fixed number  $\eta$  normally taken to be in  $(0, 1)$ . In this case, the excess risk  
200 decreases in expectation with rate  $O(1/\sqrt{n})$ .

Theorem 4.5 also implies that the excess risk converges to zero in probability. For  $\alpha_i = \eta/\sqrt{i}$  it is  
straightforward to check that

$$\limsup_{n \rightarrow +\infty} \mathbb{P} \left( \mathcal{R}_A(\hat{f}_n) - \inf_{f \in \mathcal{F}} \mathcal{R}_A(f) > 0 \right) = 0.$$

201 Finite sample bounds with high probability can also be provided under stronger assumptions about  
202 the stochastic gradients. See for instance Nemirovski et al. [2009].

## 203 5 Functional Linear Regression: numerical results

204 In this section, we provide two applications of the Functional Linear Regression problem. We first  
205 demonstrate the performance of both algorithms in simulated data and next we provide an example  
206 for generalized linear models, when predicting the presence or not of Multiple Sclerosis (MS) after  
207 receiving as input a tract profile of corpus callosum (CCA) obtained by Diffusion Tensor Imaging.

208 As we have seen in Section 3, the operator in the FLR case is given by

$$A[f](\mathbf{x}) = \int_0^T f(s) \mathbf{x}(s) ds. \quad (5)$$

209 Remember that in this example we are denoting  $\mathbf{w}$  by  $s$ . Hence

$$\begin{aligned} \langle A[f], g \rangle_{L^2(\mathbb{X})} &= \mathbb{E}[A[f](\mathbf{X})g(\mathbf{X})] \\ &= \mathbb{E} \left[ \int_0^T f(s) \mathbf{X}(s) ds g(\mathbf{X}) \right] \\ &= \int_0^T f(s) \mathbb{E}[\mathbf{X}(s)g(\mathbf{X})] ds = \langle f, A^*[g] \rangle_{L^2(\mathbb{W})} \end{aligned}$$

where  $A^* : L^2(\mathbb{X}) \rightarrow L^2(\mathbb{W})$  is given by

$$A^*[g](s) = \mathbb{E}[\mathbf{X}(s)g(\mathbf{X})].$$

Therefore, we have  $\Phi(\mathbf{x}; s) = \mathbf{x}(s)$ , and using the squared loss, we find, as in Eq. (4),

$$u_i(s) = \mathbf{x}_i(s)(A[\hat{g}_{i-1}](\mathbf{x}_i) - \mathbf{y}_i).$$

---

<sup>2</sup>This assumption is satisfied for all the examples analyzed in this paper.

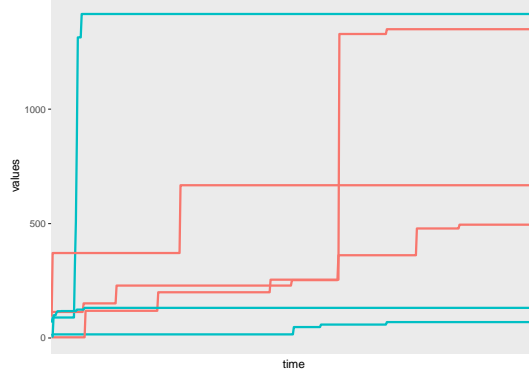

Figure 1: Example of cumulative credits for six different addresses across 501 data points. In red, addresses associated with criminal activity, in blue, addresses associated with noncriminal activities.

## 210 5.1 Synthetic Data

211 We will consider the simulation study presented in González-Manteiga and Martínez-Calvo [2011].  
 212 Specifically, we set  $\mathbb{W} = [0, 1]$ ,  $f^\circ(z) = \sin(4\pi z)$ , and  $\mathbf{X}$  simulated accordingly a Brownian motion  
 213 in  $[0, 1]$ . We also consider a noise-signal ratio of 0.2. We generate 100 samples of  $\mathbf{X}$  and  $\mathbf{Y}$  with  
 214 the integral defining the operator  $A$  approximated by a finite sum of 1000 points in  $[0, 1]$ . For the  
 215 observed data used in the algorithm procedure, we consider a coarser grid where and each functional  
 216 sample is observed at only 100 equally-spaced times. For the ML-SGD algorithm, we used smoothing  
 217 splines as base learners. We compared the results with a Functional Penalized Linear Regression  
 218 (FPLR) with B-splines and cross-validation to select the number of basis expansion. In order to fit the  
 219 PFLR model, we used the package *refund* Goldsmith et al. [2021] available in R. In the supplementary  
 220 material we can see the estimated observation  $A[\hat{f}_n](\mathbf{x}_i)$  against the true values  $A[f^\circ](\mathbf{x}_i)$  using both  
 221 the SGD-SIP and the ML-SGD algorithm essentially recovers the true function, with a noisier fit for  
 222 the SGD-SIP. The benchmark algorithms also recovers the true function. We refer the reader to the  
 223 supplementary material for more details about the simulation.

## 224 5.2 Real Data Application

Next we consider a classification problem in the FLR setting. The data set contains 3000 examples of  
 bitcoin wallets (address) and the respective cumulative credit in each wallet. Each address contain  
 501 equally spaced observations from April 2011 and April 2017. For each address, we also have  
 a category describing the category of the address. In Table 5.2 we present a summary of the data.  
 We refer the reader to the supplementary material for more information about the data set used  
 that we make available online. Here we use the cumulative credit curve at each point in time as  
 the explanatory variables  $\mathbf{X} \in \mathbb{X} = L^2([0, 1])$  and  $Y \in \{-1, 1\}$  as the predicted outcome for the  
 indicator variable that the category is *darknet* (addresses associated with ilegal activities). We propose  
 the following model with a the log-likelihood of the negative binomial as the loss function:

$$\log \frac{P(Y = 1|\mathbf{X})}{P(Y = -1|\mathbf{X})} = \int_0^T f(s)\mathbf{X}(s)ds.$$

|   | category            | obs  | mean_credit_begin | mean_credit_end |
|---|---------------------|------|-------------------|-----------------|
| 1 | Darknet Marketplace | 1512 | 234.41            | 1264.86         |
| 2 | Exchanges           | 379  | 673.19            | 14026.14        |
| 3 | Gambling            | 390  | 86.83             | 2369.12         |
| 4 | Pools               | 374  | 1211.11           | 15334.20        |
| 5 | Services/others     | 345  | 242.39            | 4094.89         |

Table 1: Summary information for the bitcoin wallet observations.

225 In Figure 1 we have the cumulative credit for 3 legal and 3 illegal accounts. We compare the SGD-SIP  
 226 and ML-SGD algorithm with PFLR methods. For the ML-SGD algorithm, we use two types of base

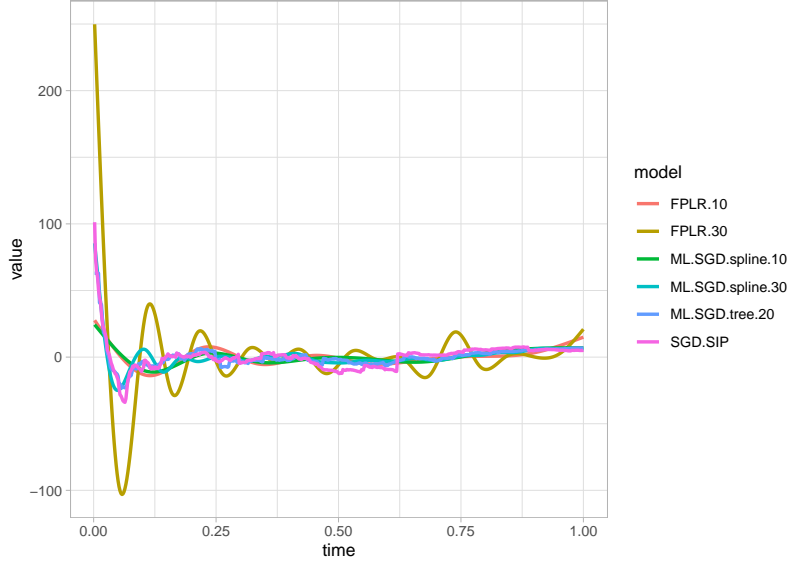

Figure 2: Fitted curves for each of the methods described in Section 5.2.

learner, regression trees and cubic splines. The step sizes are taken to be equal of the form  $O(1/\sqrt{i})$ , where  $i = 1, \dots, n$  is the current step of the algorithm and  $n$  is the total number of steps/sample. For the PFLR algorithm, we use cubic splines with different degrees of freedom and quadratic penalty term. We highlight that those choices of splines and penalty term are widely used in the literature. In Table 5.2 we provide 3-fold cross validation for the accuracy and kappa metrics. The SGD-SIP Algorithm achieved the best average performance in terms of accuracy. The same performance is achieved by the Functional PLR with cubic splines with number of knots equal to 30 and penalization for the derivative of the estimate. The ML-SGD algorithm with smooth splines with 30 degrees of freedom also achieved similar performance with a smoother estimator. In Figure 2 we show the final function fit for each of the methods listed in Table 5.2. We refer the reader to the supplementary material for results under different choices of step size, number of knots and base functions for the PFLR model, other metrics and confusion matrices. In order to fit the PFLR mode, we used the package *refund* Goldsmith et al. [2021] available in R.

|                         | fold_1 | fold_2 | fold_3 | avg_accuracy |
|-------------------------|--------|--------|--------|--------------|
| ML-SGD-spline(k = 20)   | 0.78   | 0.79   | 0.78   | 0.79         |
| ML-SGD-spline(k = 10)   | 0.74   | 0.74   | 0.70   | 0.73         |
| ML-SGD-tree(depth = 20) | 0.79   | 0.78   | 0.77   | 0.78         |
| SGD-SIP                 | 0.80   | 0.80   | 0.80   | 0.80         |
| FPLR(k = 10)            | 0.75   | 0.74   | 0.72   | 0.74         |
| FPLR(k = 20)            | 0.82   | 0.79   | 0.80   | 0.80         |

Table 2: Results for three fold cross-validation.

## 6 Conclusion

In this work, we provided a novel numerical method to solve SIP based on stochastic gradients with theoretical guarantees for the excess risk. Moreover, we have shown how one can improve algorithmic performance by estimating base-learners for each stochastic gradient in the same spirit as boosting algorithms. Our “framework” can be applied in a variety of settings ranging from deconvolution problems to FLR problems and others. We demonstrate the performance of our method with numerical studies and also with a real world application data and comparing with widely used techniques in the FLR setting.

## References

- Curtis R Vogel. *Computational methods for inverse problems*. SIAM, 2002.
- Llew Mason, Jonathan Baxter, Peter Bartlett, and Marcus Frean. Boosting algorithms as gradient descent in function space. In *Proc. NIPS*, volume 12, pages 512–518, 1999.
- Jerome H Friedman. Greedy function approximation: a gradient boosting machine. *Annals of statistics*, pages 1189–1232, 2001.
- V.N. Sudakovand and L.A. Khalfin. Statistical approach to ill-posed problems in mathematical geophysics. *Sov. Math.—Dokl.*, 157, 1964.
- J. Kaipio and E. Somersalo. *Statistical and Computational Inverse Problems*. Springer, 2004.
- Steven N Evans and Philip B Stark. Inverse problems as statistics. *Inverse problems*, 18(4):R55, 2002.
- Laurent Cavalier. Nonparametric statistical inverse problems. *Inverse Problems*, 24(3):034004, 2008.
- Luis Tenorio. Statistical regularization of inverse problems. *SIAM review*, 43(2):347–366, 2001.
- Nicolai Bissantz, Thorsten Hohage, Axel Munk, and Frits Ruymgaart. Convergence rates of general regularization methods for statistical inverse problems and applications. *SIAM Journal on Numerical Analysis*, 45(6):2610–2636, 2007.
- Nicolai Bissantz, Thorsten Hohage, and Axel Munk. Consistency and rates of convergence of nonlinear tikhonov regularization with random noise. *Inverse Problems*, 20(6):1773, 2004.
- Nicolai Bissantz and Hajo Holzmann. Statistical inference for inverse problems. *Inverse Problems*, 24(3):034009, 2008.
- Martin Zinkevich. Online convex programming and generalized infinitesimal gradient ascent. In *Proceedings of the 20th international conference on machine learning (icml-03)*, pages 928–936, 2003.
- Yurii Nesterov et al. *Lectures on convex optimization*, volume 137. Springer, 2018.
- Kyong Hwan Jin, Michael T McCann, Emmanuel Froustey, and Michael Unser. Deep convolutional neural network for inverse problems in imaging. *IEEE Transactions on Image Processing*, 26(9):4509–4522, 2017.
- Gregory Ongie, Ajil Jalal, Christopher A Metzler, Richard G Baraniuk, Alexandros G Dimakis, and Rebecca Willett. Deep learning techniques for inverse problems in imaging. *IEEE Journal on Selected Areas in Information Theory*, 1(1):39–56, 2020.
- Housen Li, Johannes Schwab, Stephan Antholzer, and Markus Haltmeier. NETT: Solving inverse problems with deep neural networks. *Inverse Problems*, 36(6):065005, 2020.
- Jonas Adler and Ozan Öktem. Solving ill-posed inverse problems using iterative deep neural networks. *Inverse Problems*, 33(12):124007, 2017.
- Yanna Bai, Wei Chen, Jie Chen, and Weisi Guo. Deep learning methods for solving linear inverse problems: Research directions and paradigms. *Signal Processing*, page 107729, 2020.
- Bangti Jin, Zehui Zhou, and Jun Zou. On the saturation phenomenon of stochastic gradient descent for linear inverse problems. *SIAM/ASA Journal on Uncertainty Quantification*, 9(4):1553–1588, 2021.
- Junqi Tang, Karen Egiazarian, and Mike Davies. The limitation and practical acceleration of stochastic gradient algorithms in inverse problems. In *ICASSP 2019-2019 IEEE International Conference on Acoustics, Speech and Signal Processing (ICASSP)*, pages 7680–7684. IEEE, 2019.
- Bangti Jin, Zehui Zhou, and Jun Zou. On the convergence of stochastic gradient descent for nonlinear ill-posed problems. *SIAM Journal on Optimization*, 30(2):1421–1450, 2020.
- T Tony Cai and Peter Hall. Prediction in functional linear regression. *The Annals of Statistics*, 34(5):2159–2179, 2006.
- Fang Yao, Hans-Georg Müller, and Jane-Ling Wang. Functional linear regression analysis for longitudinal data. *The Annals of Statistics*, pages 2873–2903, 2005.
- Peter Hall and Joel L Horowitz. Methodology and convergence rates for functional linear regression. *The Annals of Statistics*, 35(1):70–91, 2007.

- 294 Jeff Goldsmith, Jennifer Bobb, Ciprian M Crainiceanu, Brian Caffo, and Daniel Reich. Penalized functional  
295 regression. *Journal of computational and graphical statistics*, 20(4):830–851, 2011.
- 296 Jeffrey S Morris. Functional regression. *Annual Review of Statistics and Its Application*, 2:321–359, 2015.
- 297 Gareth M James, Jing Wang, and Ji Zhu. Functional linear regression that’s interpretable. *The Annals of*  
298 *Statistics*, 37(5A):2083–2108, 2009.
- 299 Yingying Fan, Gareth M James, and Peter Radchenko. Functional additive regression. *The Annals of Statistics*,  
300 43(5):2296–2325, 2015.
- 301 Boris T Polyak and Anatoli B Juditsky. Acceleration of stochastic approximation by averaging. *SIAM journal*  
302 *on control and optimization*, 30(4):838–855, 1992.
- 303 Jari Kaipio and Erkki Somersalo. Statistical inverse problems: discretization, model reduction and inverse  
304 crimes. *Journal of computational and applied mathematics*, 198(2):493–504, 2007.
- 305 Arkadi Nemirovski, Anatoli Juditsky, Guanghui Lan, and Alexander Shapiro. Robust stochastic approximation  
306 approach to stochastic programming. *SIAM Journal on optimization*, 19(4):1574–1609, 2009.
- 307 Wenceslao González-Manteiga and Adela Martínez-Calvo. Bootstrap in functional linear regression. *Journal of*  
308 *Statistical Planning and Inference*, 141(1):453–461, 2011.
- 309 Jeff Goldsmith, Fabian Scheipl, Lei Huang, Julia Wrobel, Chongzhi Di, Jonathan Gellar, Jaroslaw Harezlak,  
310 Mathew W. McLean, Bruce Swihart, Luo Xiao, Ciprian Crainiceanu, and Philip T. Reiss. *refund: Regression*  
311 *with Functional Data*, 2021. URL <https://CRAN.R-project.org/package=refund>. R package version  
312 0.1-24.

## 313 Checklist

- 314 1. For all authors...
- 315 (a) Do the main claims made in the abstract and introduction accurately reflect the paper’s contribu-  
316 tions and scope? [Yes]
- 317 (b) Did you describe the limitations of your work? [Yes] We did both in the problem formulation  
318 and in the numerical studies.
- 319 (c) Did you discuss any potential negative societal impacts of your work? [No] We do not believe  
320 that the methods proposed here could cause a negative impact in the society of any kind and this  
321 discussion was not necessary.
- 322 (d) Have you read the ethics review guidelines and ensured that your paper conforms to them? [Yes]
- 323 2. If you are including theoretical results...
- 324 (a) Did you state the full set of assumptions of all theoretical results? [Yes] Please refer to 4
- 325 (b) Did you include complete proofs of all theoretical results? [Yes] Proofs are in the main text and  
326 in the supplementary material.
- 327 3. If you ran experiments...
- 328 (a) Did you include the code, data, and instructions needed to reproduce the main experimental  
329 results (either in the supplemental material or as a URL)? [Yes] The codes and data used are  
330 available online and in the supplementary material. Please, refer to the supplemental material.
- 331 (b) Did you specify all the training details (e.g., data splits, hyperparameters, how they were chosen)?  
332 [Yes] Please refer to Section 5 and the supplementary material.
- 333 (c) Did you report error bars (e.g., with respect to the random seed after running experiments  
334 multiple times)? [Yes] In the main text we reported results with 3folds cross-validation. In the  
335 online supplementary material we report results with synthetic data with error bars for the seed  
336 and additional validation.
- 337 (d) Did you include the total amount of compute and the type of resources used (e.g., type of GPUs,  
338 internal cluster, or cloud provider)? [No] The algorithms are simple and all the methods run in  
339 standard computers. Cloud computer and GPUs were not used.
- 340 4. If you are using existing assets (e.g., code, data, models) or curating/releasing new assets...
- 341 (a) If your work uses existing assets, did you cite the creators? [Yes] Please, see Section 5
- 342 (b) Did you mention the license of the assets? [Yes] Please, see Section 5
- 343 (c) Did you include any new assets either in the supplemental material or as a URL? [No] The  
344 existing assets are already available online.

- 345 (d) Did you discuss whether and how consent was obtained from people whose data you're us-  
346 ing/curating? [No] The assets used are already available for public use.
- 347 (e) Did you discuss whether the data you are using/curating contains personally identifiable infor-  
348 mation or offensive content? [No] The data is not identifiable or offensive. Please, refer to the  
349 description provided in Section 5
- 350 5. If you used crowdsourcing or conducted research with human subjects...
- 351 (a) Did you include the full text of instructions given to participants and screenshots, if applicable?  
352 [N/A]
- 353 (b) Did you describe any potential participant risks, with links to Institutional Review Board (IRB)  
354 approvals, if applicable? [N/A]
- 355 (c) Did you include the estimated hourly wage paid to participants and the total amount spent on  
356 participant compensation? [N/A]

## A Functional Gradient for the Deconvolution Problem

Remember that the operator  $A$  is given by

$$A[f](\mathbf{x}) = \int_{\mathbb{W}} k(\mathbf{x} - \mathbf{w})f(\mathbf{w})d\mu(\mathbf{w}). \quad (6)$$

Hence,

$$\begin{aligned} \langle A[f], g \rangle_{L^2(\mathbb{X})} &= \mathbb{E}[A[f](\mathbf{X})g(\mathbf{X})] \\ &= \mathbb{E} \left[ \left( \int_{\mathbb{W}} k(\mathbf{X} - \mathbf{w})f(\mathbf{w})d\mu(\mathbf{w}) \right) g(\mathbf{X}) \right] \\ &= \int_{\mathbb{W}} \mathbb{E}[k(\mathbf{X} - \mathbf{w})g(\mathbf{X})]f(\mathbf{w})d\mu(\mathbf{w}) \\ &= \langle f, A^*[g] \rangle_{L^2(\mathbb{W})}, \end{aligned}$$

where

$$A^*[g](\mathbf{w}) = \mathbb{E}[k(\mathbf{X} - \mathbf{w})g(\mathbf{X})].$$

Therefore, we have  $\Phi(\mathbf{x}; \mathbf{w}) = k(\mathbf{x} - \mathbf{w})$ , and using the squared loss, we find, as in Eq. (4),

$$u_i(\mathbf{w}) = k(\mathbf{x}_i - \mathbf{w})(A[\hat{g}_{i-1}](\mathbf{x}_i) - \mathbf{y}_i).$$

We highlight here the need to use each observation only once in order to compute the stochastic gradient so we can have precisely  $n$  steps for the SGD-SIP/ML-SGD algorithm. In this case, the samples can be used to provide unbiased estimators for the gradient of the risk function under the populational distribution.

## B Numerical Studies: Synthetic Data

In this section we present the numerical studies of our proposed algorithms with standard benchmarks from the literature. We studied both the Functional Linear Regression problem and the Deconvolution problem. We remind the reader that the same framework can also be used to solve different types of inverse problems under a statistical framework, such as ODEs and PDEs.

### B.1 Functional Linear Regression

Recall 5 where for the FLR problem our goal is to recover  $f^\circ$  when we have access to observations of the form

$$Y = A[f^\circ](X) + \epsilon,$$

where the operator  $A$  is given by

$$A[f](\mathbf{x}) = \int_0^T f(s)\mathbf{x}(s)ds. \quad (7)$$

Recall the data generating process described in 5.1. We set  $\mathbb{W} = [0, 1]$ ,  $f^\circ(z) = \sin(4\pi z)$ , and  $\mathbf{X}$  simulated accordingly a Brownian motion in  $[0, 1]$ . We also consider a noise-signal ratio of 0.2. We generate 3000 samples of  $\mathbf{X}$  and  $\mathbf{Y}$  with the integral defining the operator  $A$  approximated by a finite sum of 1000 points in  $[0, 1]$ . For the observed data used in the algorithm procedure, we consider a coarser grid where and each functional sample is observed at only 100 equally-spaced times. For the ML-SGD algorithm, we used smoothing splines as base learners. We compare our algorithm with the Landweber method, which is a Gradient Descent version for deterministic Inverse Problems and Functional Penalized Linear Regression (FPLR). For the ML-SGD, SGD and Landweber method, the step sizes were taken fixed to be  $(100/\sqrt{n})$  (which satisfy the requirements discussed after 4.5).

Table 3: MSE results for three fold cross-validation.

|                                  | fold_1  | fold_2  | fold_3  |
|----------------------------------|---------|---------|---------|
| ML-SGD-spline(k = 20, eta = 1.5) | 1.8E-05 | 1.6E-05 | 1.5E-05 |
| ML-SGD-spline(k = 20, eta = 1)   | 2.8E-05 | 3.0E-05 | 2.3E-05 |
| ML-SGD-tree(depth = 10)          | 1.5E-03 | 1.7E-03 | 1.3E-03 |
| SGD                              | 1.6E-03 | 1.6E-03 | 1.1E-03 |
| Landweber                        | 1.6E-03 | 1.6E-03 | 1.1E-03 |
| FPLR(k = 5)                      | 9.3E-03 | 9.5E-03 | 9.5E-03 |
| FPLR(k = 10)                     | 9.3E-03 | 9.5E-03 | 9.5E-03 |
| FPLR(k = 15)                     | 9.3E-03 | 9.5E-03 | 9.5E-03 |

In ?? and ?? we present the Mean Absolute Error and Mean Square Error for out-of-sample predictions of the outcome  $Y$  using three-folds cross validation. In ?? we have an example of a plot for the ML-SGD method with smoothing splines with 15 degrees of freedom. We also added an estimator for the SGD algorithm and FPLR with 15 knots. All the procedures essentially recovers the true  $f^\circ$  with a slightly worse (and noiser) estimator for the SGD.

Table 4: MAE results for three fold cross-validation.

|                                  | fold_1  | fold_2  | fold_3  |
|----------------------------------|---------|---------|---------|
| ML-SGD-spline(k = 20, eta = 1.5) | 3.4E-03 | 3.2E-03 | 3.1E-03 |
| ML-SGD-spline(k = 20, eta = 1)   | 4.2E-03 | 4.4E-03 | 3.9E-03 |
| ML-SGD-tree(depth = 10)          | 3.1E-02 | 3.3E-02 | 2.8E-02 |
| SGD                              | 3.2E-02 | 3.2E-02 | 2.6E-02 |
| Landweber                        | 3.2E-02 | 3.2E-02 | 2.6E-02 |
| FPLR(k = 5)                      | 7.7E-02 | 7.8E-02 | 7.8E-02 |
| FPLR(k = 10)                     | 7.7E-02 | 7.8E-02 | 7.8E-02 |
| FPLR(k = 15)                     | 7.7E-02 | 7.8E-02 | 7.8E-02 |

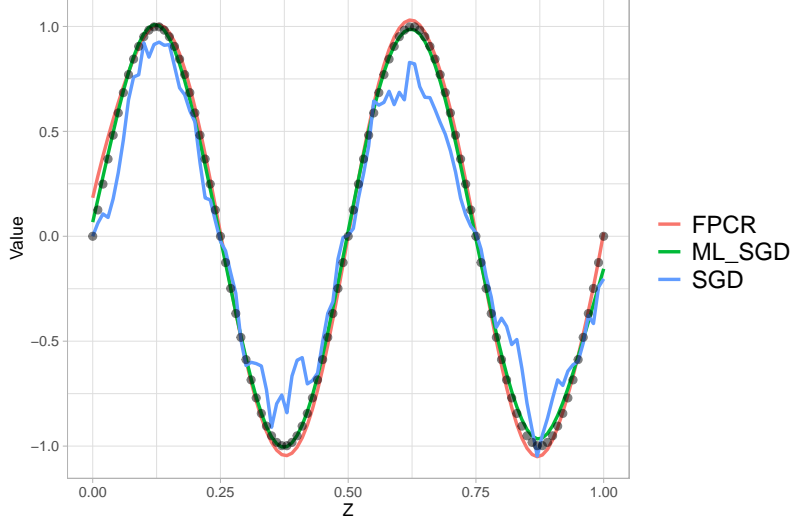

Figure 3: Functional parameter estimated with SGD-SIP, ML-SGD, FPLR and the respective true function.

## B.2 Deconvolution

For the deconvolution problem we examine the following numerical exercise. We take two choices of functional parameters for Eq. (6), as a peak function:

$$f(z) = e^{-w^2}. \quad (8)$$

We consider the kernel to be given by

$$k(z) = 1_{\{z \geq 0\}}$$

and the following parameters for the data generating process. First we discretize the space  $\mathbb{W} = [-10, 10]$  with increments  $h = 0.01$ . We use the same for the space  $\mathbb{X} = [-10, 10]$ . Next, we use the discretized space to generate the true values  $A[f]$  where we approximate the integral by a finite sum. The second step is to generate the random observations. For that, we consider a coarser grid for  $\mathbb{X}$ , with grid  $h_{obs} = 0.1$ , i.e. 10 times less information than the simulation used to generate the true observations. This reproduces the fact that in practice one cannot hope to observe the functional data over all points. Moreover, when computing the operator  $A$  in our algorithm, we again consider a coarser grid for  $\mathbb{W}$ , with grid  $h_{obs} = 0.1$ . We then add iid noise terms  $N(0, 2)$  to the observations  $A[f]$  collected from the coarse grid. For the ML-SGD algorithm (Algorithm 2), we used smooth splines with 5 degrees of freedom as  $\mathcal{H}$  in order to estimate the stochastic gradients. We compare our algorithms with the well-known landweber iteration, which resamples the standard Gradient Descent algorithm when ignoring noise and using all the samples available in all the iterations. We start with  $f_0(z) = 0$  in all the algorithms.

In Figure 4 we can see that ML-SGD outputs a smooth estimator for the functional parameter  $f^\circ$  while the other two methods tends to overfit the data. The situation is worse for the Landweber method, which requires a better understanding in when stopping the procedure due to the reuse of all the data available in every iteration.

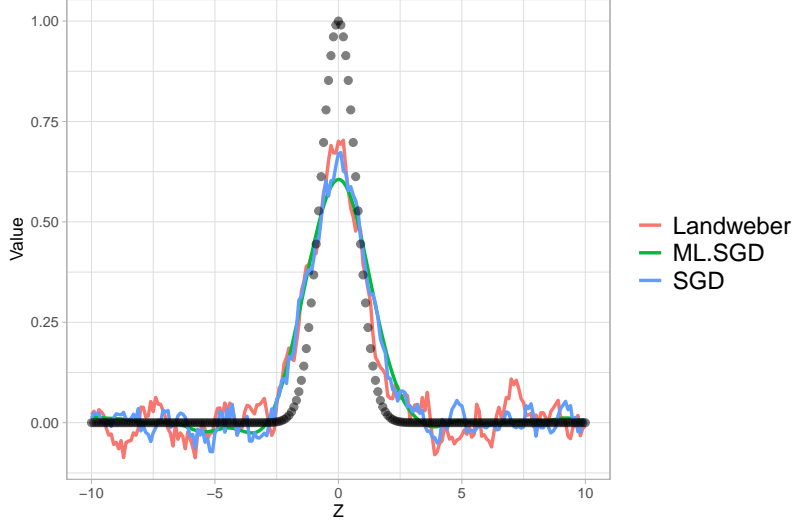

Figure 4: Deconvolution: Comparison with Landweber. True values are shown as the black points.

## C Proof of Theorem 4.5

*Proof.* First, it is straightforward to check that  $\mathcal{R}_A$  is convex in  $\mathcal{F}$ : if  $f, g \in \mathcal{F}$  and  $\lambda \in [0, 1]$ , then

$$\begin{aligned}\mathcal{R}_A(\lambda f + (1 - \lambda)g) &= \mathbb{E}[\ell(\mathbf{Y}, A[\lambda f + (1 - \lambda)g](\mathbf{X}))] \\ &= \mathbb{E}[\ell(\mathbf{Y}, \lambda A[f](\mathbf{X}) + (1 - \lambda)A[g](\mathbf{X}))] \\ &\leq \mathbb{E}[\lambda \ell(\mathbf{Y}, A[f](\mathbf{X}))] + \mathbb{E}[(1 - \lambda)\ell(\mathbf{Y}, A[g](\mathbf{X}))] \\ &= \lambda \mathcal{R}_A(f) + (1 - \lambda)\mathcal{R}_A(g).\end{aligned}$$

For simplicity of notation we will denote the norm and inner product in  $L^2(\mathbb{W})$  by  $\|\cdot\|$  and  $\langle \cdot, \cdot \rangle$ . Moreover, we assume  $d = 1$ . The multivariate case follows similarly.

By the Algorithm 1 procedure, we have that

$$\begin{aligned}\frac{1}{2}\|\hat{g}_i - f^\circ\|^2 &= \frac{1}{2}\|\hat{g}_{i-1} - \alpha_i u_i - f^\circ\|^2 \\ &= \frac{1}{2}\|\hat{g}_{i-1} - f^\circ\|^2 - \alpha_i \langle u_i, \hat{g}_{i-1} - f^\circ \rangle + \frac{\alpha_i^2}{2}\|u_i\|^2 \\ &= \frac{1}{2}\|\hat{g}_{i-1} - f^\circ\|^2 - \alpha_i \langle u_i - \nabla \mathcal{R}_A(\hat{g}_{i-1}), \hat{g}_{i-1} - f^\circ \rangle + \frac{\alpha_i^2}{2}\|u_i\|^2 - \alpha_i \langle \nabla \mathcal{R}_A(\hat{g}_{i-1}), \hat{g}_{i-1} - f^\circ \rangle \\ &\leq \frac{1}{2}\|\hat{g}_{i-1} - f^\circ\|^2 - \alpha_i \langle u_i - \nabla \mathcal{R}_A(\hat{g}_{i-1}), \hat{g}_{i-1} - f^\circ \rangle + \frac{\alpha_i^2}{2}\|u_i\|^2 - \alpha_i (\mathcal{R}_A(\hat{g}_{i-1}) - \mathcal{R}_A(f^\circ)),\end{aligned}$$

where the last inequality follows from convexity of the loss function (Assumption 2). Rearranging terms we get

$$\mathcal{R}_A(\hat{g}_{i-1}) - \mathcal{R}_A(f^\circ) \leq \frac{1}{2\alpha_i} (\|\hat{g}_{i-1} - f^\circ\|^2 - \|\hat{g}_i - f^\circ\|^2) + \frac{\alpha_i}{2}\|u_i\|^2 - \langle u_i - \nabla \mathcal{R}_A(\hat{g}_{i-1}), \hat{g}_{i-1} - f^\circ \rangle.$$

Summing over  $i$  leads to

$$\begin{aligned}\sum_{i=1}^n \mathcal{R}_A(\hat{g}_{i-1}) - \mathcal{R}_A(f^\circ) &\leq \sum_{i=1}^n \frac{1}{2\alpha_i} (\|\hat{g}_{i-1} - f^\circ\|^2 - \|\hat{g}_i - f^\circ\|^2) \\ &\quad + \sum_{i=1}^n \frac{\alpha_i}{2}\|u_i\|^2 \\ &\quad - \sum_{i=1}^n \langle u_i - \nabla \mathcal{R}_A(\hat{g}_{i-1}), \hat{g}_{i-1} - f^\circ \rangle.\end{aligned}$$

411

For the first term, by Assumption 5, we find

$$\begin{aligned} \sum_{i=1}^n \frac{1}{2\alpha_i} (\|\hat{g}_{i-1} - f^\circ\|^2 - \|\hat{g}_i - f^\circ\|^2) &= \sum_{i=2}^n \left( \frac{1}{2\alpha_i} - \frac{1}{2\alpha_{i-1}} \right) \|\hat{g}_{i-1} - f^\circ\|^2 \\ &\quad + \frac{1}{2\alpha_1} \|\hat{g}_0 - f^\circ\|^2 - \frac{1}{2\alpha_n} \|\hat{g}_n - f^\circ\|^2 \\ &\leq \sum_{i=2}^n \left( \frac{1}{2\alpha_i} - \frac{1}{2\alpha_{i-1}} \right) D^2 + \frac{1}{2\alpha_1} D^2 = \frac{D^2}{2\alpha_n}, \end{aligned}$$

412

since  $\hat{g}_i \in \mathcal{F}$  for all  $i = 1, \dots, n$ .

413

To bound the second term, notice that

$$\begin{aligned} \|u_i\|^2 &= \|\Phi(\mathbf{x}_i, \cdot)(\mathbf{y}_i - A[\hat{g}_{i-1}](\mathbf{x}_i))\|^2 = \|\Phi(\mathbf{x}_i, \cdot)\|^2 \cdot \|\mathbf{y}_i - A[\hat{g}_{i-1}](\mathbf{x}_i)\|^2 \\ &\leq 2\|\Phi(\mathbf{x}_i, \cdot)\|^2 \cdot (\|\mathbf{y}_i\|^2 + \|A[\hat{g}_{i-1}](\mathbf{x}_i)\|^2). \end{aligned}$$

414

Hence, if we take  $C = \sup_{\mathbf{x} \in \mathbb{X}} \|\Phi(\mathbf{x}, \cdot)\|^2 < +\infty$ , we find

$$\begin{aligned} \mathbb{E}[\|u_i\|^2] &\leq 2C\mathbb{E}[(\|\mathbf{Y}\|^2 + \|A[\hat{g}_{i-1}](\mathbf{X})\|^2)] = 2C(\mathbb{E}[\|\mathbf{Y}\|^2] + \|A[\hat{g}_{i-1}]\|_{L^2(\mathbb{X})}^2) \\ &\leq 2C(\mathbb{E}[\|\mathbf{Y}\|^2] + \|A\|^2 \|\hat{g}_{i-1}\|_{L^2(\mathbb{X})}^2) \leq 2C(\mathbb{E}[\|\mathbf{Y}\|^2] + \|A\|^2 D^2). \end{aligned}$$

415

Finally, for the third term, note that, after taking expectation, the tower property and the fact that  $u_i$  is an unbiased estimator of the gradient of  $\mathcal{R}_A$  (see Eq. (4)) give that

416

$$\begin{aligned} \mathbb{E}[\langle u_i - \nabla \mathcal{R}_A(\hat{g}_{i-1}), \hat{g}_{i-1} - f^\circ \rangle] &= \int_{\mathbb{W}} \mathbb{E}[(u_i(\mathbf{w}) - \nabla \mathcal{R}_A(\hat{g}_{i-1})(\mathbf{w}))(\hat{g}_{i-1}(\mathbf{w}) - f^\circ(\mathbf{w}))] d\mu(\mathbf{w}) \\ &= \int_{\mathbb{W}} \mathbb{E}[\mathbb{E}[(u_i(\mathbf{w}) - \nabla \mathcal{R}_A(\hat{g}_{i-1})(\mathbf{w}))(\hat{g}_{i-1}(\mathbf{w}) - f^\circ(\mathbf{w})) \mid \mathcal{D}_{i-1}]] d\mu(\mathbf{w}) \\ &= \int_{\mathbb{W}} \mathbb{E}[(\mathbb{E}[u_i(\mathbf{w}) \mid \mathcal{D}_{i-1}] - \nabla \mathcal{R}_A(\hat{g}_{i-1})(\mathbf{w}))(\hat{g}_{i-1}(\mathbf{w}) - f^\circ(\mathbf{w}))] d\mu(\mathbf{w}) \\ &= \int_{\mathbb{W}} \mathbb{E}[(\mathbb{E}_{(\mathbf{X}, \mathbf{Y})}[\Phi(\mathbf{X}, \mathbf{w})(A[\hat{g}_{i-1}](\mathbf{X}) - \mathbf{Y})] - \nabla \mathcal{R}_A(\hat{g}_{i-1})(\mathbf{w}))(\hat{g}_{i-1}(\mathbf{w}) - f^\circ(\mathbf{w}))] d\mu(\mathbf{w}) \\ &= \int_{\mathbb{W}} \mathbb{E}[(\nabla \mathcal{R}_A(\hat{g}_{i-1})(\mathbf{w}) - \nabla \mathcal{R}_A(\hat{g}_{i-1})(\mathbf{w}))(\hat{g}_{i-1}(\mathbf{w}) - f^\circ(\mathbf{w}))] d\mu(\mathbf{w}) = 0, \end{aligned}$$

417

where  $\mathcal{D}_{i-1}$  denotes the  $\sigma$ -algebra generated by the data  $\{\mathbf{x}_k, \mathbf{y}_k\}_{k=1}^{i-1}$  and  $\mathbb{E}_{(\mathbf{X}, \mathbf{Y})}$  is the expectation only with respect to  $(\mathbf{X}, \mathbf{Y})$ .

418

Again, by convexity of the risk function,  $\mathcal{R}_A(\hat{f}_n) \leq \frac{1}{n} \sum_{i=1}^n \mathcal{R}_A(\hat{g}_i)$ . Therefore,

$$\mathbb{E}[\mathcal{R}_A(\hat{f}_n) - \mathcal{R}_A(f^\circ)] \leq \frac{D^2}{2n\alpha_n} + \frac{1}{2n} \sum_{i=1}^n \alpha_i \mathbb{E}[\|u_i\|^2] \leq \frac{D^2}{2n\alpha_n} + \frac{C(\mathbb{E}[\|\mathbf{Y}\|^2] + \|A\|^2 D^2)}{n} \sum_{i=1}^n \alpha_i,$$

419

and the theorem is proved.  $\square$

420

## D Dataset

421

A link for a github webpage with the data will be provided. The link is omitted at the moment to not reveal the authors identity.

422
